# Supplementary material for: Stereoelectronic effects of the glycosidic linkage on the conformational preference of d-sucrose
Source: Royal Society of Chemistry journal article supplement (doi:10.1039/c6ra24413k), 2016-01-01
Supplement: c6ra24413k1.pdf [file c6ra24413k1.pdf]

# Stereoelectronic effects of the glycosidic linkage on the conformational preference of D-Sucrose

Thiago de Castro Rozada, Rodrigo Meneghetti Pontes, Roberto Rittner, and Ernani Abicht Basso

## 1 Electronic Supplementary Information

### List of Tables

|    |                                                                                                                                     |    |
|----|-------------------------------------------------------------------------------------------------------------------------------------|----|
| S1 | Optimized conformations of D-Sucrose (energy with ZPE correction) at M06-2X/6-31++G(d,p) level in vacuum . . . . .                  | 2  |
| S2 | Optimized conformations of D-Sucrose (energy with ZPE correction) at M06-2X/6-31++G(d,p) level in water (IEF-PCM/bondi) . . . . .   | 3  |
| S3 | Orbital interactions (kcal mol <sup>-1</sup> ) for the conformations of D-Sucrose calculated at M06-2X/6-31++G(d,p) level . . . . . | 4  |
| S4 | Cartesian coordinates of S1-gt-tg-gg optimized at M06-2X/6-31++G(d,p) level in water (IEF-PCM/bondi) . . . . .                      | 9  |
| S5 | Cartesian coordinates of S2-gt-gt-gg optimized at M06-2X/6-31++G(d,p) level in water (IEF-PCM/bondi) . . . . .                      | 10 |
| S6 | Cartesian coordinates of S3-gt-tg-gt optimized at M06-2X/6-31++G(d,p) level in water (IEF-PCM/bondi) . . . . .                      | 11 |
| S7 | Cartesian coordinates of S1-gg-tg-gg optimized at M06-2X/6-31++G(d,p) level in water (IEF-PCM/bondi) . . . . .                      | 12 |
| S8 | Cartesian coordinates of S1-tg-tg-gg optimized at M06-2X/6-31++G(d,p) level in water (IEF-PCM/bondi) . . . . .                      | 13 |
| S9 | Cartesian coordinates of S1-gt-tg-gg <sup>ccw</sup> optimized at M06-2X/6-31++G(d,p) level in water (IEF-PCM/bondi) . . . . .       | 14 |

**Table S1.** Optimized conformations of D-Sucrose (energy with ZPE correction) at M06-2X/6-31++G(d,p) level in vacuum

| Entr. | Conformer                  | Dihedral Angle |             |             |             |                | Dipole<br>Moment (D) | $\Delta E$<br>(kcal.mol <sup>-1</sup> ) |
|-------|----------------------------|----------------|-------------|-------------|-------------|----------------|----------------------|-----------------------------------------|
|       |                            | O5-C1-O1-C8    | C1-O1-C8-O8 | O5-C5-C6-O6 | O8-C8-C7-O7 | O8-C11-C12-O12 |                      |                                         |
| 1     | S1-gg-tg-gg                | 111.9          | -52.5       | -66.3       | -176.6      | -62.1          | 2.042                | 0.38                                    |
| 2     | S1-gt-tg-gg                | 111.5          | -46.0       | 88.4        | -179.4      | -59.2          | 3.135                | 0.58                                    |
| 3     | S1-tg-tg-gg                | 111.4          | -52.7       | -173.4      | -177.0      | -61.7          | 3.016                | 0.00                                    |
| 4     | S1-gt-tg-gg <sup>ccw</sup> | 107.9          | -36.8       | 78.0        | 171.4       | -66.2          | 4.085                | 2.27                                    |
| 5     | S2-gg-gt-tg                | 86.0           | -168.4      | -64.6       | 53.2        | 171.5          | 1.781                | 10.09                                   |
| 6     | S2-gg-gt-gg                | 100.0          | -162.5      | -65.3       | 66.2        | -59.4          | 2.715                | 5.67                                    |
| 7     | S2-gg-tg-gg                | 97.2           | -170.0      | -65.6       | 176.8       | -60.4          | 2.496                | 7.51                                    |
| 8     | S2-gt-gt-gg                | 95.0           | -161.4      | 59.7        | 61.6        | -59.3          | 3.974                | 7.16                                    |
| 9     | S2-tg-gt-gg                | 85.5           | -169.1      | -179.5      | 53.0        | 171.5          | 1.999                | 9.74                                    |
| 10    | S2-tg-gt-gg                | 99.9           | -162.0      | -175.3      | 66.7        | -59.6          | 3.937                | 5.73                                    |
| 11    | S3-gt-tg-gt                | 104.9          | -41.3       | -62.8       | 173.7       | 172.4          | 4.122                | 7.73                                    |
| 12    | S3-tg-tg-tg                | 104.8          | -40.4       | -178.6      | 173.2       | 172.1          | 4.520                | 8.21                                    |
| 13    | S4-gg-gt-tg                | 65.9           | -78.1       | -63.3       | 47.9        | 173.4          | 3.168                | 10.92                                   |
| 14    | S4-gg-gt-tg                | 68.7           | -83.4       | -64.1       | 52.6        | 172.8          | 1.655                | 9.55                                    |
| 15    | S4-gg-gt-gt                | 63.2           | -79.8       | -63.2       | 50.4        | 69.7           | 3.417                | 10.38                                   |
| 16    | S4-gt-gg-gt                | 67.3           | -80.1       | 66.8        | -74.8       | 74.2           | 2.837                | 9.20                                    |
| 17    | S4-gt-gt-tg                | 68.3           | -72.8       | 66.6        | 45.8        | 174.3          | 3.461                | 11.21                                   |
| 18    | S4-tg-gt-tg                | 65.6           | -79.0       | -178.0      | 48.9        | 173.2          | 3.766                | 11.46                                   |
| 19    | S4-tg-gt-gt                | 64.5           | -73.7       | 175.0       | 47.8        | 63.4           | 5.747                | 7.84                                    |
| 20    | S5-gg-tg-gg                | 111.4          | 60.8        | -65.4       | -176.2      | -53.9          | 2.687                | 7.90                                    |
| 21    | S6-gg-tg-tg                | 112.5          | -48.6       | -63.5       | -178.4      | 176.0          | 2.440                | 7.72                                    |
| 22    | S7-gg-tg-gg                | 78.5           | -179.3      | -66.4       | -167.4      | -74.5          | 3.400                | 8.19                                    |

**Table S2.** Optimized conformations of D-Sucrose (energy with ZPE correction) at M06-2X/6-31++G(d,p) level in water (IEF-PCM/bondi)

| Entr. | Conformer                  | Dihedral Angle |             |             |             |                | Dipole Moment (D) | $\Delta E$ (kcal.mol <sup>-1</sup> ) |
|-------|----------------------------|----------------|-------------|-------------|-------------|----------------|-------------------|--------------------------------------|
|       |                            | O5-C1-O1-C8    | C1-O1-C8-O8 | O5-C5-C6-O6 | O8-C8-C7-O7 | O8-C11-C12-O12 |                   |                                      |
| 1     | S1-gg-tg-gg                | 112.0          | -52.5       | -61.5       | -176.9      | -63.6          | 2.816             | 0.08                                 |
| 2     | S1-gt-tg-gg                | 110.8          | -44.9       | 83.6        | 179.3       | -58.8          | 4.984             | 0.00                                 |
| 3     | S1-tg-tg-gg                | 111.6          | -53.3       | 179.6       | -177.1      | -62.9          | 4.315             | 1.01                                 |
| 4     | S1-gt-tg-gg <sup>ccw</sup> | 107.9          | -40.3       | 81.7        | 171.5       | -60.7          | 7.113             | 0.75                                 |
| 5     | S2-gg-gt-tg                | 92.5           | -171.5      | -61.6       | 52.4        | 172.7          | 1.808             | 6.95                                 |
| 6     | S2-gg-gt-gg                | 97.2           | -159.3      | -62.9       | 62.0        | -61.0          | 4.415             | 2.07                                 |
| 7     | S2-gg-tg-gg                | 90.7           | -165.4      | -61.7       | -178.0      | -60.3          | 3.200             | 5.11                                 |
| 8     | S2-gt-gt-gg                | 93.8           | -160.1      | 61.9        | 57.1        | -61.1          | 6.501             | 1.79                                 |
| 9     | S2-tg-gt-gg                | 93.2           | -171.0      | -178.8      | 51.7        | -78.1          | 2.564             | 7.58                                 |
| 10    | S2-tg-gt-gg                | 97.1           | -158.5      | 179.6       | 61.6        | -61.0          | 6.103             | 3.10                                 |
| 11    | S3-gt-tg-gt                | 95.5           | -61.9       | 53.4        | 173.9       | 68.7           | 7.217             | 3.21                                 |
| 12    | S3-tg-tg-tg                | 103.1          | -44.6       | -178.4      | 173.4       | 174.9          | 6.496             | 4.49                                 |
| 13    | S4-gg-gt-tg                | 69.2           | -78.9       | -62.0       | 44.9        | 176.6          | 4.226             | 7.67                                 |
| 14    | S4-gg-gt-tg                | 70.5           | -78.4       | -61.5       | 46.2        | 172.3          | 2.626             | 8.34                                 |
| 15    | S4-gg-gt-gt                | 68.8           | -78.3       | -62.0       | 44.7        | 67.8           | 4.805             | 6.95                                 |
| 16    | S4-gt-gg-gt                | 64.2           | -73.0       | 63.9        | -53.1       | 67.9           | 3.900             | 5.74                                 |
| 17    | S4-gt-gt-tg                | 66.1           | -75.6       | 65.1        | 43.8        | 175.8          | 4.730             | 7.57                                 |
| 18    | S4-tg-gt-tg                | 68.8           | -77.0       | 179.9       | 44.0        | 175.7          | 4.973             | 8.50                                 |
| 19    | S4-tg-gt-gt                | 67.5           | -73.8       | 172.5       | 43.4        | 63.6           | 7.714             | 5.39                                 |
| 20    | S5-gg-tg-gg                | 107.1          | 64.7        | -62.7       | -150.1      | -56.3          | 3.407             | 4.15                                 |
| 21    | S6-gg-tg-tg                | 90.4           | 45.4        | -61.2       | -175.1      | 175.0          | 3.076             | 8.13                                 |
| 22    | S7-gg-tg-gg                | 74.3           | -168.1      | -62.1       | -167.9      | -63.3          | 4.786             | 4.89                                 |

**Table S3.** Orbital interactions (kcal mol<sup>-1</sup>) for the conformations of D-Sucrose calculated at M06-2X/6-31++G(d,p) level

| Entry | Orbital Interactions                        | S1-gt-tg-gg | S2-gt-gt-gg | S3-gt-tg-gt | S1-gg-tg-gg | S1-tg-tg-gg | S1-gt-tg-gg <sup>ccw</sup> |
|-------|---------------------------------------------|-------------|-------------|-------------|-------------|-------------|----------------------------|
| 1     | $\eta_{O5} \rightarrow \sigma_{O7-HO7}^*$   | -           | 1.53        | -           | -           | -           | -                          |
| 2     | $\eta_{O5} \rightarrow \sigma_{O7-HO7}^*$   | -           | 3.57        | -           | -           | -           | -                          |
| 3     | $\eta_{O5} \rightarrow \sigma_{O12-HO12}^*$ | 3.96        | -           | -           | 3.12        | 2.82        | 4.69                       |
| 4     | $\eta_{O5} \rightarrow \sigma_{O12-HO12}^*$ | 4.46        | -           | -           | 5.58        | 5.53        | 4.48                       |
| 5     | $\eta_{O5} \rightarrow \sigma_{O6-HO6}^*$   | -           | -           | 0.51        | -           | -           | -                          |
| 6     | $\eta_{O1} \rightarrow \sigma_{O2-HO2}^*$   | -           | -           | -           | -           | -           | 1.21                       |
| 7     | $\eta_{O1} \rightarrow \sigma_{O9-HO9}^*$   | -           | -           | 3.84        | -           | -           | -                          |
| 8     | $\eta_{O1} \rightarrow \sigma_{O12-HO12}^*$ | -           | 3.07        | -           | -           | -           | -                          |
| 9     | $\eta_{O2} \rightarrow \sigma_{O7-HO7}^*$   | 3.32        | -           | 4.74        | 2.83        | 2.60        | -                          |
| 10    | $\eta_{O2} \rightarrow \sigma_{O7-HO7}^*$   | 7.04        | -           | 7.75        | 9.64        | 10.25       | -                          |
| 11    | $\eta_{O2} \rightarrow \sigma_{O9-HO9}^*$   | -           | 3.17        | -           | -           | -           | -                          |
| 12    | $\eta_{O2} \rightarrow \sigma_{O9-HO9}^*$   | -           | 9.57        | -           | -           | -           | -                          |
| 13    | $\eta_{O3} \rightarrow \sigma_{O2-HO2}^*$   | -           | -           | -           | 0.51        | 0.75        | -                          |
| 14    | $\eta_{O3} \rightarrow \sigma_{O4-HO4}^*$   | -           | -           | -           | -           | -           | 0.70                       |
| 15    | $\eta_{O4} \rightarrow \sigma_{O3-HO3}^*$   | 0.63        | 0.71        | 0.70        | 0.52        | -           | -                          |
| 16    | $\eta_{O6} \rightarrow \sigma_{O4-HO4}^*$   | -           | -           | -           | -           | 2.19        | -                          |
| 17    | $\eta_{O6} \rightarrow \sigma_{O4-HO4}^*$   | -           | -           | -           | -           | 6.97        | -                          |
| 18    | $\eta_{O6} \rightarrow \sigma_{O7-HO7}^*$   | -           | 0.91        | -           | -           | -           | -                          |
| 19    | $\eta_{O6} \rightarrow \sigma_{O7-HO7}^*$   | -           | 3.89        | -           | -           | -           | -                          |
| 20    | $\eta_{O6} \rightarrow \sigma_{O12-HO12}^*$ | -           | -           | 2.96        | -           | -           | -                          |
| 21    | $\eta_{O6} \rightarrow \sigma_{O12-HO12}^*$ | -           | -           | 13.54       | -           | -           | -                          |
| 22    | $\eta_{O8} \rightarrow \sigma_{O12-HO12}^*$ | 1.08        | 0.87        | -           | 0.69        | 0.75        | 0.93                       |

continues on the next page

**Table S3** – continuation of the previous page

| Entry | Orbital Interactions                           | S1-gt-tg-gg | S2-gt-gt-gg | S3-gt-tg-gt | S1-gg-tg-gg | S1-tg-tg-gg | S1-gt-tg-gg <sup>ccw</sup> |
|-------|------------------------------------------------|-------------|-------------|-------------|-------------|-------------|----------------------------|
| 23    | $\eta_{O7} \rightarrow \sigma_{O2-HO2}^*$      | -           | -           | -           | -           | -           | 2.40                       |
| 24    | $\eta_{O7} \rightarrow \sigma_{O2-HO2}^*$      | -           | -           | -           | -           | -           | 7.68                       |
| 25    | $\eta_{O20} \rightarrow \sigma_{O9-HO9}^*$     | -           | -           | -           | 2.38        | 2.29        | -                          |
| 26    | $\eta_{O12} \rightarrow \sigma_{O6-HO6}^*$     | 4.71        | -           | -           | -           | -           | 4.43                       |
| 27    | $\eta_{O12} \rightarrow \sigma_{O6-HO6}^*$     | 12.36       | -           | -           | -           | -           | 12.21                      |
| 28    | $\sigma_{C1-O1} \rightarrow \sigma_{C2-H2}^*$  | 0.82        | 0.85        | 0.95        | 0.85        | 0.87        | 0.83                       |
| 29    | $\sigma_{C1-O1} \rightarrow \sigma_{C8-C9}^*$  | 1.11        | -           | 1.18        | 1.18        | 1.16        | 1.17                       |
| 30    | $\sigma_{C1-O1} \rightarrow \sigma_{C8-O8}^*$  | -           | 1.41        | -           | -           | -           | -                          |
| 31    | $\sigma_{C2-H2} \rightarrow \sigma_{C1-O1}^*$  | 4.58        | 4.54        | -           | 4.52        | 4.51        | 4.66                       |
| 32    | $\sigma_{C8-C9} \rightarrow \sigma_{C1-O1}^*$  | 3.18        | 0.56        | 4.22        | 3.22        | 3.26        | 2.89                       |
| 33    | $\sigma_{C8-O8} \rightarrow \sigma_{C1-O1}^*$  | -           | 1.67        | -           | -           | -           | -                          |
| 34    | $\eta_{O5} \rightarrow \sigma_{C1-O1}^*$       | 2.99        | 2.21        | 1.54        | 2.80        | 2.97        | 3.14                       |
| 35    | $\eta_{O5} \rightarrow \sigma_{C1-O1}^*$       | 11.61       | 13.91       | 15.54       | 12.15       | 11.92       | 11.98                      |
| 36    | $\eta_{O8} \rightarrow \sigma_{C1-O1}^*$       | -           | 0.63        | -           | -           | -           | -                          |
| 37    | $\sigma_{C8-O1} \rightarrow \sigma_{C1-C2}^*$  | 0.72        | 0.97        | 0.72        | 0.66        | 0.66        | 0.61                       |
| 38    | $\sigma_{C8-O1} \rightarrow \sigma_{C1-O5}^*$  | -           | -           | -           | 0.50        | -           | -                          |
| 39    | $\sigma_{C8-O1} \rightarrow \sigma_{C7-H7a}^*$ | -           | 0.64        | -           | -           | -           | -                          |
| 40    | $\sigma_{C8-O1} \rightarrow \sigma_{C7-H7b}^*$ | 0.80        | -           | 0.58        | 0.74        | 0.74        | 0.81                       |
| 41    | $\sigma_{C8-O1} \rightarrow \sigma_{C8-O8}^*$  | -           | 0.54        | -           | -           | -           | -                          |
| 42    | $\sigma_{C8-O1} \rightarrow \sigma_{C9-H9}^*$  | 0.88        | 0.86        | -           | 0.83        | 0.84        | 1.00                       |
| 43    | $\sigma_{C1-C2} \rightarrow \sigma_{C8-O1}^*$  | 1.84        | 2.49        | 2.50        | 1.74        | 1.78        | 2.17                       |
| 44    | $\sigma_{C1-O5} \rightarrow \sigma_{C8-O1}^*$  | 0.57        | -           | -           | 0.56        | 0.56        | 0.56                       |
| 45    | $\sigma_{C7-H7a} \rightarrow \sigma_{C8-O1}^*$ | -           | 6.88        | -           | -           | -           | -                          |

continues on the next page

**Table S3** – continuation of the previous page

| Entry | Orbital Interactions                           | S1-gt-tg-gg | S2-gt-gt-gg | S3-gt-tg-gt | S1-gg-tg-gg | S1-tg-tg-gg | S1-gt-tg-gg <sup>ccw</sup> |
|-------|------------------------------------------------|-------------|-------------|-------------|-------------|-------------|----------------------------|
| 46    | $\sigma_{C7-H7b} \rightarrow \sigma_{C8-O1}^*$ | 5.60        | -           | 6.09        | 5.85        | 5.85        | 5.32                       |
| 47    | $\sigma_{C9-H9} \rightarrow \sigma_{C8-O1}^*$  | 4.49        | 4.97        | -           | 4.65        | 4.60        | 4.34                       |
| 48    | $\sigma_{C9-C10} \rightarrow \sigma_{C8-O1}^*$ | -           | -           | 2.24        | -           | -           | -                          |
| 49    | $\sigma_{C11-O8} \rightarrow \sigma_{C8-O1}^*$ | 0.60        | -           | 1.00        | -           | -           | 0.64                       |
| 50    | $\eta_{O8} \rightarrow \sigma_{C8-O1}^*$       | 19.08       | 19.94       | 17.32       | 19.66       | 19.65       | 18.90                      |
| 51    | $\eta_{O1} \rightarrow \sigma_{C1-C2}^*$       | 0.67        | 1.73        | 1.17        | 0.66        | 0.70        | 0.68                       |
| 52    | $\eta_{O1} \rightarrow \sigma_{C1-O5}^*$       | 0.77        | -           | -           | 0.72        | 0.72        | 0.71                       |
| 53    | $\eta_{O1} \rightarrow \sigma_{C1-H1}^*$       | 4.59        | 3.38        | 4.26        | 4.55        | 4.59        | 4.45                       |
| 54    | $\eta_{O1} \rightarrow \sigma_{C2-H2}^*$       | -           | -           | -           | -           | -           | -                          |
| 55    | $\eta_{O1} \rightarrow \sigma_{C7-C8}^*$       | 0.68        | 3.91        | 2.03        | 1.09        | 1.14        | 0.57                       |
| 56    | $\eta_{O1} \rightarrow \sigma_{C7-H7b}^*$      | -           | -           | -           | -           | -           | -                          |
| 57    | $\eta_{O1} \rightarrow \sigma_{C8-C9}^*$       | 1.73        | -           | 2.10        | 1.81        | 1.84        | 1.80                       |
| 58    | $\eta_{O1} \rightarrow \sigma_{C8-O8}^*$       | 4.71        | 4.04        | 2.04        | 3.66        | 3.59        | 5.17                       |
| 59    | $\eta_{O1} \rightarrow \sigma_{C9-H9}^*$       | -           | -           | -           | -           | -           | -                          |
| 60    | $\eta_{O1} \rightarrow \sigma_{C1-C2}^*$       | 4.60        | 1.72        | 2.22        | 4.59        | 4.50        | 3.72                       |
| 61    | $\eta_{O1} \rightarrow \sigma_{C1-O5}^*$       | 14.76       | 17.19       | 16.32       | 14.57       | 14.76       | 14.66                      |
| 62    | $\eta_{O1} \rightarrow \sigma_{C1-H1}^*$       | -           | 2.34        | 1.13        | -           | -           | -                          |
| 63    | $\eta_{O1} \rightarrow \sigma_{C2-H2}^*$       | 0.57        | -           | -           | 0.62        | 0.61        | 0.59                       |
| 64    | $\eta_{O1} \rightarrow \sigma_{C7-C8}^*$       | 7.44        | 2.53        | 5.78        | 7.18        | 7.14        | 7.93                       |
| 65    | $\eta_{O1} \rightarrow \sigma_{C7-H7b}^*$      | 0.68        | -           | -           | 0.58        | 0.57        | 0.68                       |
| 66    | $\eta_{O1} \rightarrow \sigma_{C8-C9}^*$       | 0.56        | 7.51        | -           | -           | -           | 0.89                       |
| 67    | $\eta_{O1} \rightarrow \sigma_{C8-O8}^*$       | 8.87        | 2.60        | 13.97       | 10.77       | 11.03       | 7.84                       |
| 68    | $\sigma_{C1-H1} \rightarrow \sigma_{C7-H7a}^*$ | -           | -           | 0.89        | -           | -           | -                          |

continues on the next page

**Table S3** – continuation of the previous page

| Entry | Orbital Interactions                             | S1-gt-tg-gg | S2-gt-gt-gg | S3-gt-tg-gt | S1-gg-tg-gg | S1-tg-tg-gg | S1-gt-tg-gg <sup>ccw</sup> |
|-------|--------------------------------------------------|-------------|-------------|-------------|-------------|-------------|----------------------------|
| 69    | $\sigma_{C12-H12a} \rightarrow \sigma_{C5-H5}^*$ | -           | -           | 0.52        | -           | -           | -                          |
| 70    | $\eta_{O9} \rightarrow \sigma_{C1-H1}^*$         | -           | 0.60        | -           | -           | -           | -                          |
| 71    | $\eta_{O9} \rightarrow \sigma_{C12-H12a}^*$      | -           | -           | 0.99        | -           | -           | -                          |
| 72    | $\eta_{O12} \rightarrow \sigma_{C10-H10}^*$      | -           | 0.66        | -           | 0.64        | 0.62        | -                          |
| 73    | $\sigma_{C6-O6} \rightarrow \sigma_{C5-O5}^*$    | -           | -           | -           | -           | 2.12        | -                          |
| 74    | $\sigma_{C6-O6} \rightarrow \sigma_{C4-C5}^*$    | 1.26        | 1.59        | 1.36        | -           | -           | 1.28                       |
| 75    | $\sigma_{C6-O6} \rightarrow \sigma_{C5-H5}^*$    | -           | -           | -           | 1.01        | -           | -                          |
| 76    | $\sigma_{C5-O5} \rightarrow \sigma_{C6-O6}^*$    | -           | -           | -           | -           | 2.14        | -                          |
| 77    | $\sigma_{C4-C5} \rightarrow \sigma_{C6-O6}^*$    | 2.27        | 2.42        | 2.60        | -           | -           | 2.27                       |
| 78    | $\sigma_{C5-H5} \rightarrow \sigma_{C6-O6}^*$    | 1.33        | 0.79        | -           | 4.67        | -           | 1.24                       |
| 79    | $\sigma_{C6-H6a} \rightarrow \sigma_{C4-C5}^*$   | -           | -           | -           | 3.30        | -           | -                          |
| 80    | $\sigma_{C6-H6a} \rightarrow \sigma_{C5-O5}^*$   | 4.54        | 4.37        | 4.32        | 0.72        | 0.57        | 4.80                       |
| 81    | $\sigma_{C6-H6a} \rightarrow \sigma_{C5-H5}^*$   | -           | -           | -           | -           | 2.52        | -                          |
| 82    | $\sigma_{C6-H6a} \rightarrow \sigma_{O6-HO6}^*$  | 2.35        | -           | 2.29        | -           | -           | 2.48                       |
| 83    | $\sigma_{C6-H6b} \rightarrow \sigma_{C4-C5}^*$   | -           | -           | -           | -           | 2.83        | -                          |
| 84    | $\sigma_{C6-H6b} \rightarrow \sigma_{C5-O5}^*$   | 1.64        | 1.08        | -           | 4.95        | 0.57        | 1.57                       |
| 85    | $\sigma_{C6-H6b} \rightarrow \sigma_{C5-H5}^*$   | 2.49        | 2.79        | 2.73        | -           | -           | 2.61                       |
| 86    | $\sigma_{C6-H6b} \rightarrow \sigma_{O6-HO6}^*$  | -           | 2.29        | -           | 2.60        | -           | -                          |
| 87    | $\sigma_{C5-O1} \rightarrow \sigma_{C6-H6a}^*$   | 0.74        | 1.03        | 0.91        | -           | -           | 0.69                       |
| 88    | $\sigma_{C4-C5} \rightarrow \sigma_{C6-H6a}^*$   | -           | -           | -           | 1.10        | -           | -                          |
| 89    | $\sigma_{C5-H5} \rightarrow \sigma_{C6-H6a}^*$   | -           | -           | -           | -           | 2.14        | -                          |
| 90    | $\sigma_{C5-O5} \rightarrow \sigma_{C6-H6b}^*$   | -           | -           | -           | 0.95        | -           | -                          |
| 91    | $\sigma_{C4-C5} \rightarrow \sigma_{C6-H6b}^*$   | -           | -           | -           | -           | 1.07        | -                          |

continues on the next page

**Table S3** – continuation of the previous page

| Entry | Orbital Interactions                           | S1-gt-tg-gg | S2-gt-gt-gg | S3-gt-tg-gt | S1-gg-tg-gg | S1-tg-tg-gg | S1-gt-tg-gg <sup>ccw</sup> |
|-------|------------------------------------------------|-------------|-------------|-------------|-------------|-------------|----------------------------|
| 92    | $\sigma_{C5-H5} \rightarrow \sigma_{C6-H6b}^*$ | 2.03        | 2.31        | 2.27        | -           | -           | 2.06                       |
| 93    | $\eta_{O5} \rightarrow \sigma_{O6-HO6}^*$      | -           | -           | 0.51        | -           | -           | -                          |
| 94    | $\eta_{O4} \rightarrow \sigma_{O6-HO6}^*$      | -           | -           | -           | -           | -           | -                          |
| 95    | $\eta_{O4} \rightarrow \sigma_{O6-HO6}^*$      | -           | -           | -           | -           | -           | -                          |
| 96    | $\Sigma$                                       | 165.71      | 157.24      | 158.33      | 155.92      | 159.29      | 166.44                     |



**Table S4.** Cartesian coordinates of S1-gt-tg-gg optimized at M06-2X/6-31++G(d,p) level in water (IEF-PCM/bondi)

| Energy (Hartree) = -1297.5808111 |            |             |             |
|----------------------------------|------------|-------------|-------------|
| ZPE (Hartree) = 0.3740493        |            |             |             |
| C                                | 0.72648600 | -0.44289200 | -1.04824300 |
| C                                | 2.07293000 | -1.15356000 | -0.92097400 |
| C                                | 2.84756900 | -0.63389200 | 0.27740700  |
| C                                | 2.95929000 | 0.88449900  | 0.22080500  |
| C                                | 1.54985400 | 1.47833300  | 0.11949500  |
| C                                | 1.53132700 | 2.99428400  | 0.02349400  |
| C                                | 1.32898600 | -2.70473700 | -0.72558300 |
| C                                | 1.39826300 | -1.26311800 | -0.24361400 |
| C                                | 2.21453400 | -1.05071000 | 1.04108000  |
| C                                | 2.62344200 | 0.40898400  | 0.88523000  |
| C                                | 2.96185900 | 0.45448200  | -0.60237900 |
| C                                | 2.84362600 | 1.79420800  | -1.29814600 |
| O                                | 0.91911500 | 0.95517000  | -1.06622200 |
| O                                | 0.08844300 | -0.79190700 | 0.04005600  |
| O                                | 1.81416600 | -2.54321300 | -0.81490100 |
| O                                | 4.11938300 | -1.25768300 | 0.25137700  |
| O                                | 3.60480900 | 1.29258100  | 1.41695800  |
| O                                | 0.30727100 | 3.56172800  | 0.45996600  |
| O                                | 2.03995200 | -0.47208400 | -1.21700500 |
| O                                | 0.67031100 | -3.49565300 | 0.24720200  |
| O                                | 1.51837100 | -1.27918900 | 2.23904900  |
| O                                | 3.75585800 | 0.79027400  | 1.63437600  |
| O                                | 1.53247700 | 2.32933600  | -1.23396900 |
| H                                | 0.25036000 | -0.69307200 | -1.99945600 |
| H                                | 2.64892600 | -0.94379600 | -1.83211500 |
| H                                | 2.31259200 | -0.90720300 | 1.19931100  |
| H                                | 3.54960400 | 1.17629500  | -0.65827500 |
| H                                | 0.97210100 | 1.17553600  | 1.00381900  |
| H                                | 2.30581500 | 3.39977800  | 0.67859600  |
| H                                | 1.76259300 | 3.28756400  | -1.00971000 |
| H                                | 2.66121200 | -3.00762800 | -0.75138500 |
| H                                | 4.59910600 | -0.99350700 | 1.04905100  |
| H                                | 4.18664000 | 2.04072600  | 1.23424000  |
| H                                | 0.42291900 | 3.21776800  | -0.08716600 |
| H                                | 0.81412900 | -2.74956500 | -1.69374700 |
| H                                | 2.34367100 | -3.09022900 | -0.84940400 |
| H                                | 3.11871300 | -1.67436800 | 0.98301700  |
| H                                | 1.76342200 | 1.05508800  | 1.11111700  |
| H                                | 3.98517900 | 0.08033500  | -0.73887900 |
| H                                | 3.51532800 | 2.50789100  | -0.81388900 |
| H                                | 3.15392000 | 1.67836700  | -2.34329200 |
| H                                | 0.27506600 | -3.26916300 | 0.18738700  |
| H                                | 1.21419400 | -2.19945300 | 2.23523400  |
| H                                | 3.48462500 | 0.95188300  | 2.54756400  |
| H                                | 0.88304600 | 1.64658800  | -1.47853600 |

**Table S5.** Cartesian coordinates of S2-gt-gt-gg optimized at M06-2X/6-31++G(d,p) level in water (IEF-PCM/bondi)

| Energy (Hartree) = -1297.5779288 |            |             |             |
|----------------------------------|------------|-------------|-------------|
| ZPE (Hartree) = 0.3740220        |            |             |             |
| C                                | 0.63314300 | -0.03904600 | -1.21862700 |
| C                                | 1.07367400 | -1.50175600 | -1.23359400 |
| C                                | 1.86056800 | -1.84200500 | 0.02189400  |
| C                                | 3.00048300 | -0.84678700 | 0.21341400  |
| C                                | 2.43618400 | 0.57593700  | 0.21728900  |
| C                                | 3.49440100 | 1.65789000  | 0.30085300  |
| C                                | 0.99409200 | 2.33888400  | -1.03285200 |
| C                                | 1.41171500 | 1.02890900  | -0.37498900 |
| C                                | 2.57010100 | 0.27751500  | -1.05691900 |
| C                                | 3.13168100 | -0.54320300 | 0.10685400  |
| C                                | 2.90561600 | 0.36613700  | 1.31423300  |
| C                                | 2.43792000 | -0.33824400 | 2.57506200  |
| O                                | 1.73431400 | 0.81112400  | -1.01178800 |
| O                                | 0.31958100 | 0.11502400  | -0.19460600 |
| O                                | 0.10049100 | -2.28865200 | -1.35616900 |
| O                                | 2.34662000 | -3.16354000 | -0.12398600 |
| O                                | 3.61469800 | -1.16197600 | 1.45365000  |
| O                                | 2.89092000 | 2.94554900  | 0.34468600  |
| O                                | 1.88308100 | 1.30530500  | 0.91466400  |
| O                                | 0.01859100 | 3.03245600  | -0.28295800 |
| O                                | 2.20503700 | -0.48036500 | -2.18285800 |
| O                                | 4.50801800 | -0.84608900 | -0.00156400 |
| O                                | 1.23645500 | -1.06293200 | 2.36252300  |
| H                                | 0.22161300 | 0.23069000  | -2.19266800 |
| H                                | 1.72112800 | -1.64305900 | -2.10797000 |
| H                                | 1.19437900 | -1.78016000 | 0.89536600  |
| H                                | 3.71679900 | -0.95614000 | -0.61236400 |
| H                                | 1.73861600 | 0.68335200  | 1.06191500  |
| H                                | 4.13019300 | 1.49049200  | 1.17561900  |
| H                                | 4.11450600 | 1.62853500  | -0.60001600 |
| H                                | 0.13594200 | -3.16181800 | -1.69660400 |
| H                                | 2.82737700 | -3.39357000 | 0.68391100  |
| H                                | 4.55912500 | -0.96559400 | 1.40979200  |
| H                                | 2.58684100 | 3.11605900  | 1.24665200  |
| H                                | 1.88594800 | 2.96909300  | -1.07440500 |
| H                                | 0.66219800 | 2.15918200  | -2.06188500 |
| H                                | 3.32427500 | 1.00326800  | -1.38127900 |
| H                                | 2.54494700 | -1.46597300 | 0.20745800  |
| H                                | 3.82333900 | 0.92702500  | 1.52393800  |
| H                                | 3.20075700 | -1.05508600 | 2.89237800  |
| H                                | 2.30639200 | 0.40709300  | 3.36913800  |
| H                                | 0.85754500 | 2.64050400  | -0.44089400 |
| H                                | 1.61806000 | -1.20840900 | -1.90289500 |
| H                                | 4.61635000 | -1.57970800 | -0.62141900 |
| H                                | 0.62816000 | -0.49838500 | 1.85776400  |

**Table S6.** Cartesian coordinates of S3-gt-tg-gt optimized at M06-2X/6-31++G(d,p) level in water (IEF-PCM/bondi)

| Energy (Hartree) = -1297.5750817 |            |             |             |
|----------------------------------|------------|-------------|-------------|
| ZPE (Hartree) = 0.3734382        |            |             |             |
| C                                | 0.82706900 | -0.70047000 | -1.04796800 |
| C                                | 2.01014800 | -1.58420700 | -0.65799000 |
| C                                | 2.69133500 | -1.01887100 | 0.57967400  |
| C                                | 3.07065100 | 0.43765600  | 0.33909900  |
| C                                | 1.84434800 | 1.24018300  | -0.10727300 |
| C                                | 2.21013100 | 2.64782600  | -0.54637200 |
| C                                | 1.86150500 | -1.96271500 | -1.21827500 |
| C                                | 1.49390700 | -0.80004500 | -0.29390100 |
| C                                | 2.23305500 | -0.88713200 | 1.06973100  |
| C                                | 3.36719500 | 0.12180100  | 0.90014600  |
| C                                | 2.74968600 | 1.16656000  | -0.03276100 |
| C                                | 1.97656600 | 2.26010300  | 0.69168600  |
| O                                | 1.24680000 | 0.62167600  | -1.24991500 |
| O                                | 0.11180200 | -0.80051100 | 0.00036700  |
| O                                | 1.50274900 | -2.88927500 | -0.43648300 |
| O                                | 3.83659700 | -1.80960500 | 0.84037100  |
| O                                | 3.59618100 | 0.93788400  | 1.55910400  |
| O                                | 1.08908600 | 3.32415400  | -1.10288300 |
| O                                | 1.90090600 | 0.40240500  | -0.91145800 |
| O                                | 1.36258700 | -3.19087800 | -0.73209300 |
| O                                | 1.43479600 | -0.48068000 | 2.16057400  |
| O                                | 4.44640900 | -0.55942100 | 0.28006300  |
| O                                | 1.56249000 | 3.27075500  | -0.21197300 |
| H                                | 0.40107500 | -1.02611000 | -1.99942500 |
| H                                | 2.72139000 | -1.58584900 | -1.49268300 |
| H                                | 1.99536400 | -1.06779800 | 1.43042200  |
| H                                | 3.83314300 | 0.47194400  | -0.45146600 |
| H                                | 1.11195400 | 1.27980500  | 0.71168200  |
| H                                | 2.54159800 | 3.22960000  | 0.31564500  |
| H                                | 3.02259200 | 2.60496900  | -1.28176400 |
| H                                | 2.21686900 | -3.53370200 | -0.52922000 |
| H                                | 4.26658700 | -1.45665900 | 1.63229800  |
| H                                | 4.25857100 | 1.61595600  | 1.37408400  |
| H                                | 0.89344500 | 2.91334400  | -1.95765100 |
| H                                | 1.51363800 | -1.75223600 | -2.23685300 |
| H                                | 2.95125100 | -2.03369600 | -1.24473400 |
| H                                | 2.62232800 | -1.89914600 | 1.22569700  |
| H                                | 3.66352500 | 0.54115100  | 1.86718600  |
| H                                | 3.51334300 | 1.63472500  | -0.66298900 |
| H                                | 1.11912500 | 1.83005300  | 1.21994000  |
| H                                | 2.64292200 | 2.71518900  | 1.43349800  |
| H                                | 0.39082300 | -3.14585200 | -0.67254600 |
| H                                | 0.51460800 | -0.71703100 | 1.96718300  |
| H                                | 5.16907600 | 0.06637300  | 0.13602300  |
| H                                | 0.61194300 | 3.17881000  | -0.40449100 |

**Table S7.** Cartesian coordinates of S1-gg-tg-gg optimized at M06-2X/6-31++G(d,p) level in water (IEF-PCM/bondi)

| Energy (Hartree) = -1297.5804696 |            |             |             |
|----------------------------------|------------|-------------|-------------|
| ZPE (Hartree) = 0.3738323        |            |             |             |
| C                                | 0.62147000 | -0.42136900 | -1.01628100 |
| C                                | 1.78077900 | -1.40311900 | -0.85208800 |
| C                                | 2.49017300 | -1.16349400 | 0.46874500  |
| C                                | 2.94975700 | 0.28365700  | 0.53530200  |
| C                                | 1.75691700 | 1.22242200  | 0.32378000  |
| C                                | 2.16793200 | 2.68150700  | 0.22056400  |
| C                                | 1.81912300 | -2.19935300 | -1.17149000 |
| C                                | 1.67865400 | -0.87121300 | -0.43962900 |
| C                                | 2.55415800 | -0.78233300 | 0.82022500  |
| C                                | 2.74280600 | 0.72081000  | 0.95097800  |
| C                                | 2.89133600 | 1.13992000  | -0.51076200 |
| C                                | 2.40829400 | 2.53586900  | -0.84609300 |
| O                                | 1.09576200 | 0.90399200  | -0.91447000 |
| O                                | 0.33621100 | -0.67267900 | -0.01676200 |
| O                                | 1.25543100 | -2.71629300 | -0.93459800 |
| O                                | 3.58156600 | -2.06639900 | 0.52161900  |
| O                                | 3.52461100 | 0.48678000  | 1.81660200  |
| O                                | 3.07384900 | 2.90623500  | -0.84942400 |
| O                                | 2.11656200 | 0.17987900  | -1.26467200 |
| O                                | 1.44161700 | -3.25200500 | -0.30124400 |
| O                                | 1.99760200 | -1.34868900 | 1.97897600  |
| O                                | 3.89625200 | 1.11216200  | 1.66590800  |
| O                                | 1.06464600 | 2.75121100  | -0.45698900 |
| H                                | 0.18645000 | -0.50080600 | -2.01511600 |
| H                                | 2.48852100 | -1.22901300 | -1.67365900 |
| H                                | 1.79615100 | -1.36100000 | 1.29885500  |
| H                                | 3.69339200 | 0.45548700  | -0.25302200 |
| H                                | 1.05106500 | 1.10747500  | 1.15850200  |
| H                                | 1.27213200 | 3.30211100  | 0.11017800  |
| H                                | 2.67898900 | 2.97465200  | 1.14067400  |
| H                                | 1.97871000 | -3.34144500 | -0.78005200 |
| H                                | 4.00811000 | -1.97551000 | 1.38518900  |
| H                                | 4.22676600 | 1.14682500  | 1.75373900  |
| H                                | 2.62184100 | 2.68974200  | -1.67673700 |
| H                                | 1.21947800 | -2.20479800 | -2.08968500 |
| H                                | 2.86852700 | -2.33965400 | -1.44068300 |
| H                                | 3.52796100 | -1.23684800 | 0.58651100  |
| H                                | 1.84013900 | 1.16339300  | 1.39155900  |
| H                                | 3.94494000 | 1.04360300  | -0.80286400 |
| H                                | 3.02428400 | 3.25999200  | -0.30509400 |
| H                                | 2.53790500 | 2.70734100  | -1.92198000 |
| H                                | 0.46824500 | -3.23524000 | -0.26014600 |
| H                                | 1.82373400 | -2.28401400 | 1.79073900  |
| H                                | 3.71217400 | 1.04880600  | 2.61230700  |
| H                                | 0.49730300 | 2.07551500  | -0.86828200 |

**Table S8.** Cartesian coordinates of S1-tg-tg-gg optimized at M06-2X/6-31++G(d,p) level in water (IEF-PCM/bondi)

| Energy (Hartree) = -1297.5791994 |            |             |             |
|----------------------------------|------------|-------------|-------------|
| ZPE (Hartree) = 0.3740464        |            |             |             |
| C                                | 0.54656000 | -0.59927700 | -1.10758900 |
| C                                | 1.69534000 | -1.57943900 | -0.88205400 |
| C                                | 2.46376800 | -1.19461300 | 0.36902200  |
| C                                | 2.95498000 | 0.23950700  | 0.24932400  |
| C                                | 1.78756000 | 1.18256000  | -0.07858000 |
| C                                | 2.26691100 | 2.57266500  | -0.47561900 |
| C                                | 1.94476800 | -2.29124800 | -0.87965900 |
| C                                | 1.71919700 | -0.89201900 | -0.32257400 |
| C                                | 2.49098700 | -0.62615600 | 0.97996900  |
| C                                | 2.62806100 | 0.88785900  | 0.94260800  |
| C                                | 2.88632100 | 1.13497800  | -0.54297600 |
| C                                | 2.40071000 | 2.46417200  | -1.08256100 |
| O                                | 1.05728400 | 0.71167400  | -1.22004200 |
| O                                | 0.34536900 | -0.68664300 | -0.02445800 |
| O                                | 1.14565700 | -2.88081400 | -0.77545900 |
| O                                | 3.53841400 | -2.11215000 | 0.49229300  |
| O                                | 3.55812000 | 0.56951400  | 1.48854100  |
| O                                | 2.99773900 | 3.10901200  | 0.62315100  |
| O                                | 2.19579900 | 0.06814800  | -1.23298800 |
| O                                | 1.52126300 | -3.24749900 | 0.07622800  |
| O                                | 1.86059500 | -1.07120900 | 2.15365600  |
| O                                | 3.70720700 | 1.40289100  | 1.69365300  |
| O                                | 1.02192900 | 2.67256200  | -0.83951100 |
| H                                | 0.04475500 | -0.79891200 | -2.05694400 |
| H                                | 2.36470200 | -1.52283400 | -1.75079400 |
| H                                | 1.79927700 | -1.27238600 | 1.24110200  |
| H                                | 3.69336500 | 0.29205200  | -0.56619200 |
| H                                | 1.11835000 | 1.24503600  | 0.79145000  |
| H                                | 2.90695000 | 2.48583800  | -1.36176400 |
| H                                | 1.40515100 | 3.20390800  | -0.71470700 |
| H                                | 1.86198900 | -3.49216100 | -0.54821800 |
| H                                | 3.94551700 | -1.99602400 | 1.36163100  |
| H                                | 3.78613600 | 1.51318800  | 1.46120600  |
| H                                | 3.42420100 | 3.93007500  | 0.34624800  |
| H                                | 1.42106500 | -2.41991300 | -1.83475200 |
| H                                | 3.01502300 | -2.43001400 | -1.04949600 |
| H                                | 3.49181200 | -1.06988100 | 0.87603800  |
| H                                | 1.67994900 | 1.34598700  | 1.25280600  |
| H                                | 3.96218800 | 1.03759300  | -0.73729600 |
| H                                | 2.94619000 | 3.26829100  | -0.58038600 |
| H                                | 2.62164800 | 2.51422200  | -2.15604600 |
| H                                | 0.54720700 | -3.25374300 | 0.04399800  |
| H                                | 1.73244100 | -2.02875600 | 2.07034400  |
| H                                | 3.44748600 | 1.44348400  | 2.62337200  |
| H                                | 0.51625300 | 1.92711800  | -1.20797200 |

**Table S9.** Cartesian coordinates of S1-gt-tg-gg<sup>ccw</sup> optimized at M06-2X/6-31++G(d,p) level in water (IEF-PCM/bondi)

| Energy (Hartree) = -1297.5792451 |            |             |             |
|----------------------------------|------------|-------------|-------------|
| ZPE (Hartree) = 0.3736817        |            |             |             |
| C                                | 0.73869600 | -0.43781600 | -1.06563800 |
| C                                | 2.10581100 | -1.11464700 | -0.94913000 |
| C                                | 2.86208300 | -0.57604400 | 0.26103400  |
| C                                | 2.91701200 | 0.94465300  | 0.22143400  |
| C                                | 1.49320300 | 1.49133800  | 0.13264300  |
| C                                | 1.43476400 | 3.00708800  | 0.05560400  |
| C                                | 1.31930900 | -2.75727200 | -0.68277100 |
| C                                | 1.36375800 | -1.30471100 | -0.22078000 |
| C                                | 2.15499600 | -1.04381000 | 1.06668200  |
| C                                | 2.53963500 | 0.41872200  | 0.87991200  |
| C                                | 2.93379200 | 0.40352500  | -0.59888300 |
| C                                | 2.86745200 | 1.71172500  | -1.35678500 |
| O                                | 0.87536200 | 0.96677700  | -1.05653900 |
| O                                | 0.04394900 | -0.84453500 | 0.02983800  |
| O                                | 1.97099100 | -2.51950700 | -0.89897500 |
| O                                | 4.20065700 | -1.04573800 | 0.28619300  |
| O                                | 3.51296500 | 1.45460400  | 1.40111500  |
| O                                | 0.18056300 | 3.52885700  | 0.46296000  |
| O                                | 2.01249200 | -0.53514400 | -1.20353800 |
| O                                | 0.50616300 | -3.54055900 | 0.17770900  |
| O                                | 1.38648500 | -1.35353600 | 2.20383100  |
| O                                | 3.59932900 | 0.76714000  | 1.74217300  |
| O                                | 1.57870500 | 2.30166200  | -1.32825600 |
| H                                | 0.25943800 | -0.69036500 | -2.01440100 |
| H                                | 2.67989300 | -0.88130200 | -1.85240300 |
| H                                | 2.34111500 | -0.88008800 | 1.18126100  |
| H                                | 3.48582700 | 1.26372900  | -0.66598100 |
| H                                | 0.92690300 | 1.16155900  | 1.01456000  |
| H                                | 2.18113300 | 3.41993100  | 0.73718800  |
| H                                | 1.68514300 | 3.32038400  | -0.96727300 |
| H                                | 1.26777300 | -2.75537500 | -0.26345700 |
| H                                | 4.18838200 | -2.00151100 | 0.43327200  |
| H                                | 4.36201300 | 1.00483900  | 1.51911200  |
| H                                | 0.51963300 | 3.18217500  | -0.12070000 |
| H                                | 0.86783400 | -2.80716500 | -1.67820300 |
| H                                | 2.34112300 | -3.14752700 | -0.73922000 |
| H                                | 3.07371300 | -1.64680700 | 1.04117300  |
| H                                | 1.66156600 | 1.05702200  | 1.04810000  |
| H                                | 3.95282300 | 0.00400900  | -0.68453700 |
| H                                | 3.56345400 | 2.42104900  | -0.90019400 |
| H                                | 3.18180500 | 1.53722800  | -2.39267400 |
| H                                | 0.81730700 | -3.43805600 | 1.09003400  |
| H                                | 1.97283200 | -1.38367100 | 2.97197900  |
| H                                | 3.66533700 | 1.73012400  | 1.79015700  |
| H                                | 0.90326000 | 1.63314600  | -1.53981100 |
